# Supplementary material for: Direct Comparison of Clinical Characteristics, Outcomes, and Risk Prediction in Patients with COVID-19 and Controls—A Prospective Cohort Study
Source: MDPI journal article supplement (doi:10.3390/jcm10122672), 2021-06-17
Supplement: s1 [file s1]

## Supplementary

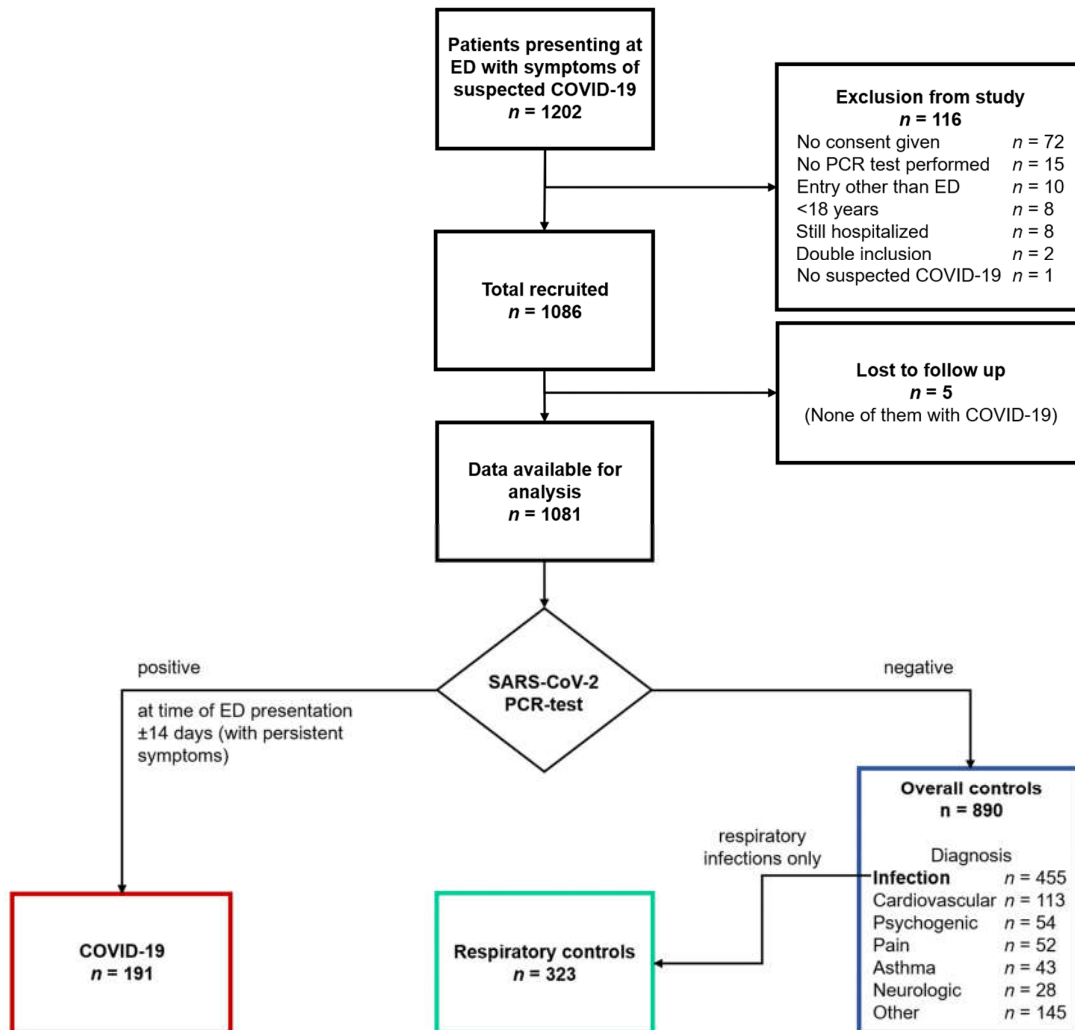

**Figure S1.** Flow chart of inclusion. ED = emergency department, COVID-19 = coronavirus disease 2019, SARS-CoV-2 = severe acute respiratory syndrome - coronavirus 2, PCR = polymerase chain reaction.

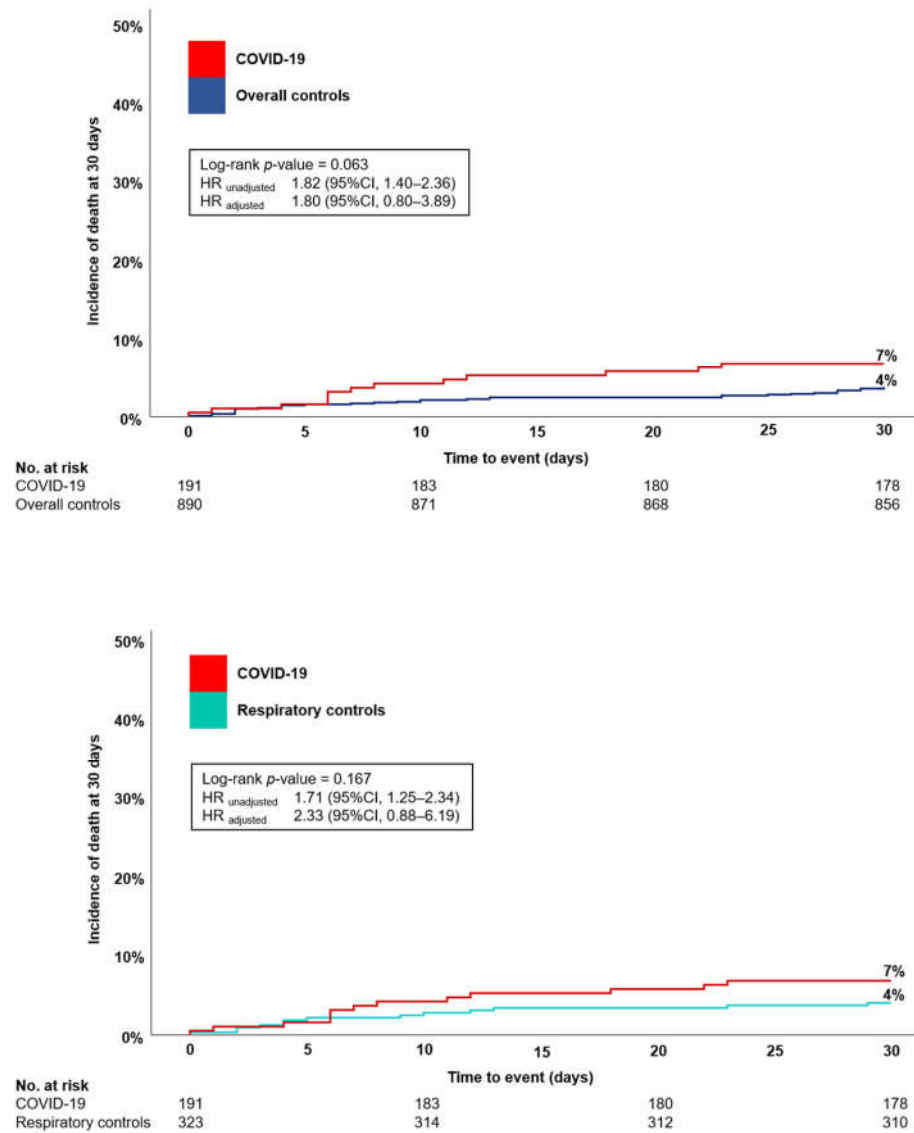

**Figure S2.** Event curve for death at 30 days in COVID-19 and controls. First panel shows incidence of death at 30 days for COVID-19 vs. overall controls; Second panel shows incidence of death at 30 days for COVID-19 vs. respiratory controls, adjustment was made for cardiac disease, pneumopathy, overweight, diabetes, active smoking, CRP, and blood oxygen saturation; COVID-19 = coronavirus disease 2019, HR = hazard ratio, CI = confidence interval, CRP = c-reactive protein.

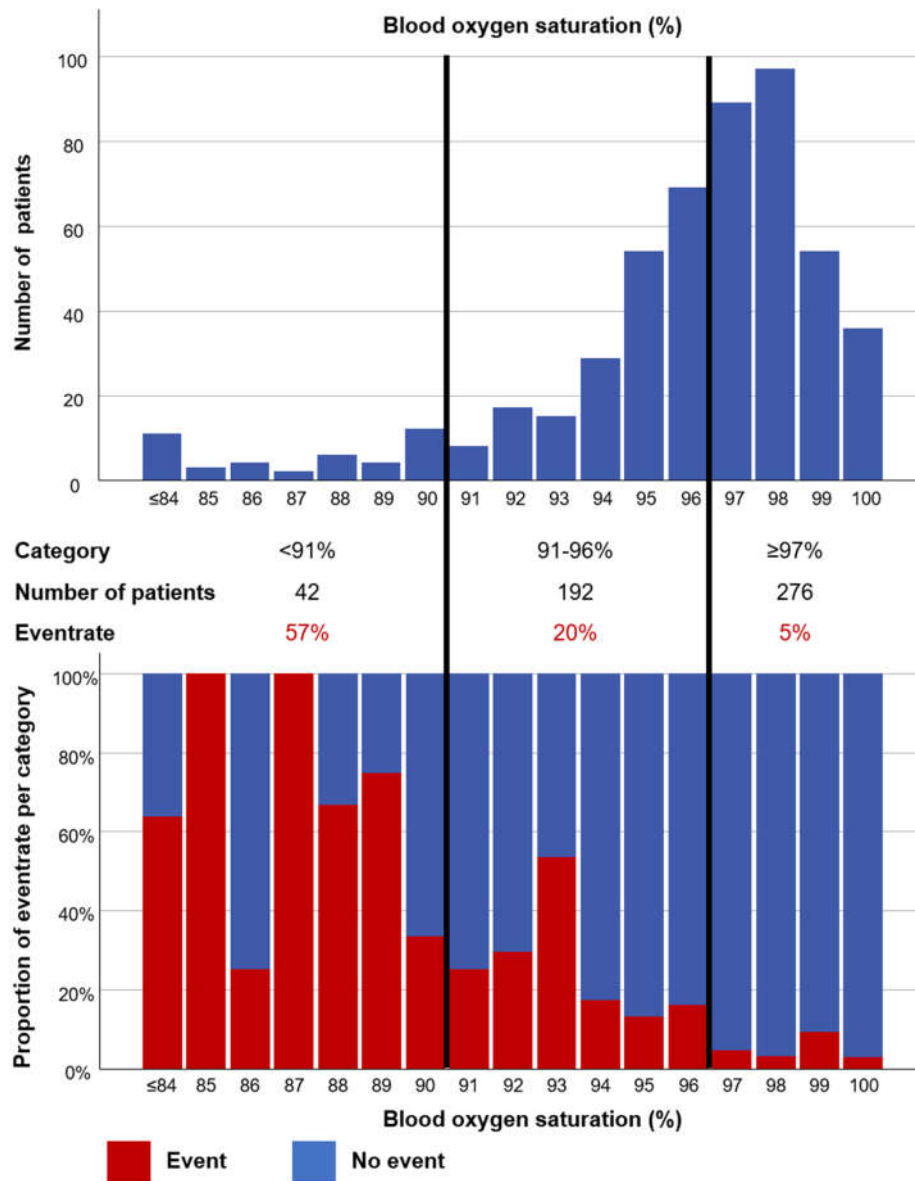

**Figure S3.** Distribution and event rate for respective blood oxygen levels in patients with any respiratory infection ( $n = 514$ , blood oxygen saturation available in  $n = 510$ , missing in  $n = 4$ ). Upper panel shows the distribution of blood oxygen saturation levels in patients with any respiratory infection; Lower panel shows the event rate of the respective blood oxygen saturation levels.

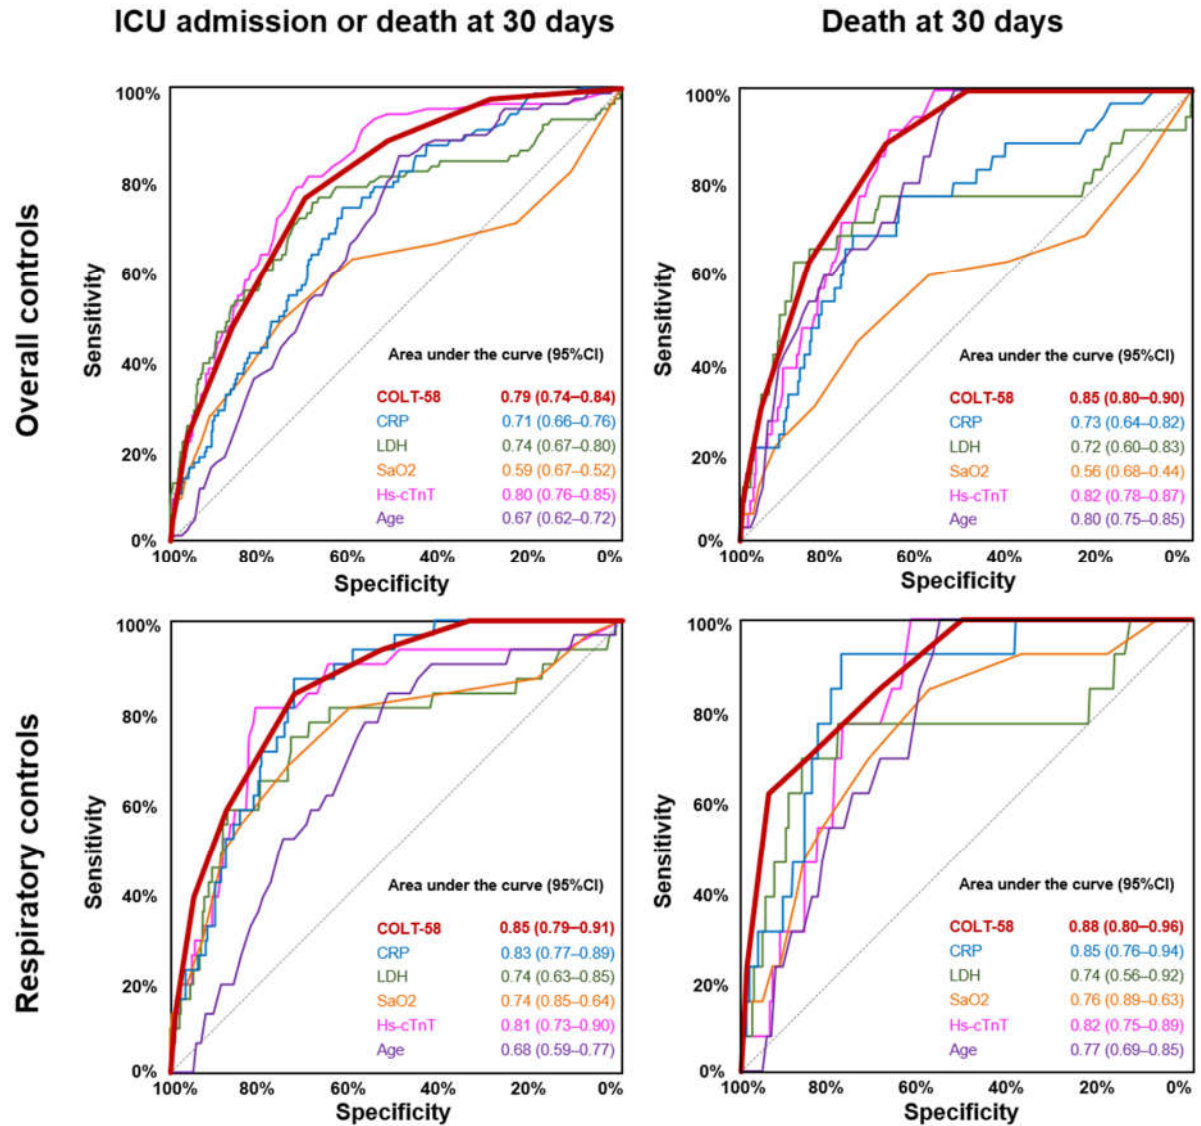

**Figure S4.** Predictive performance of the COLT-58-Score and its components in controls. Upper left panel shows the AUROC for ICU admission and death at 30 days for the COLT-58-Score, CRP, LDH, SaO2, hs-cTnT, and age in overall controls; Upper right panel shows the AUROC for death at 30 days for the COLT-58-Score, CRP, LDH, SaO2, hs-cTnT, and age in overall controls; Lower left panel shows the AUROC for ICU admission and death at 30 days for the COLT-58-Score, CRP, LDH, SaO2, hs-cTnT, and age in respiratory controls. Lower right panel shows the AUROC for death at 30 days for the COLT-58-Score, CRP, LDH, SaO2, hs-cTnT, and age in respiratory controls; AUROC = area under the receiver operating characteristic curve, ICU = intensive care unit, CI = confidence interval, CRP = c-reactive protein, LDH = lactate dehydrogenase, SaO2 = blood oxygen saturation, hs-cTnT = high-sensitivity troponin T.

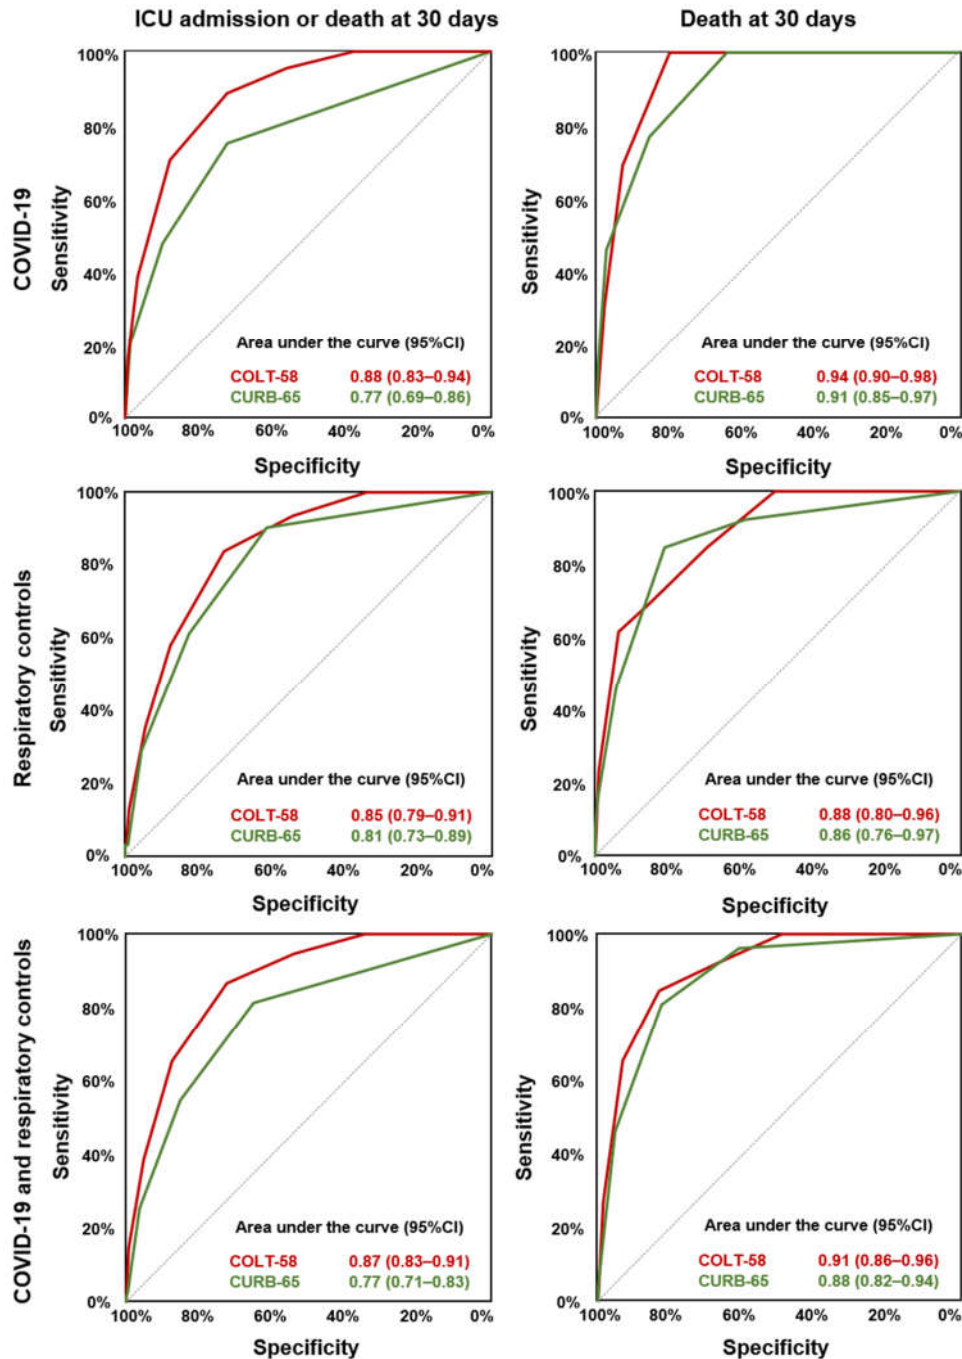

**Figure S5.** Predictive performance comparison of the COLT-58-Score and the CURB-65-Score in COVID-19 and controls. Upper left panel shows the AUROC for the primary composite outcome of ICU admission and death at 30 days for the COLT-58-Score and the CURB-65-Score in COVID-19; Upper right panel shows the AUROC for death at 30 days for the COLT-58-Score and the CURB-65-Score in COVID-19; Middle left panel shows the AUROC for the primary composite outcome of ICU admission and death at 30 days for the COLT-58-Score and the CURB-65-Score in respiratory controls; Middle right panel shows the AUROC for death at 30 days for the COLT-58-Score and the CURB-65-Score in respiratory controls; Lower left panel shows the AUROC for the primary composite outcome of ICU admission and death at 30 days for the COLT-58-Score and the CURB-65-Score in patients with any respiratory infection; Lower right panel shows the AUROC for death at 30 days for the COLT-58-Score and the CURB-65-Score in patients with any respiratory infection; COVID-19 = coronavirus disease 2019, AUROC = area under the receiver operating characteristic curve, ICU = intensive care unit, CI = confidence interval.

**Table S1.** Strobe statement.

|                           | Item No | Recommendation                                                                                                                                                                                               | Page No      |
|---------------------------|---------|--------------------------------------------------------------------------------------------------------------------------------------------------------------------------------------------------------------|--------------|
| Title and abstract        | 1       | (a) Indicate the study's design with a commonly used term in the title or the abstract                                                                                                                       | 1            |
|                           |         | (b) Provide in the abstract an informative and balanced summary of what was done and what was found                                                                                                          | 1            |
| Introduction              |         |                                                                                                                                                                                                              |              |
| Background/rationale      | 2       | Explain the scientific background and rationale for the investigation being reported                                                                                                                         | 2            |
| Objectives                | 3       | State specific objectives, including any prespecified hypotheses                                                                                                                                             | 2            |
| Methods                   |         |                                                                                                                                                                                                              |              |
| Study design              | 4       | Present key elements of study design early in the paper                                                                                                                                                      | 2–3          |
| Setting                   | 5       | Describe the setting, locations, and relevant dates, including periods of recruitment, exposure, follow-up, and data collection                                                                              | 2–3          |
| Participants              | 6       | (a) Give the eligibility criteria, and the sources and methods of selection of participants. Describe methods of follow-up                                                                                   | 2–3          |
|                           |         | (b) For matched studies, give matching criteria and number of exposed and unexposed                                                                                                                          | -            |
| Variables                 | 7       | Clearly define all outcomes, exposures, predictors, potential confounders, and effect modifiers. Give diagnostic criteria, if applicable                                                                     | 3            |
| Data sources/ measurement | 8       | For each variable of interest, give sources of data and details of methods of assessment (measurement). Describe comparability of assessment methods if there is more than one group                         | 2–3          |
| Bias                      | 9       | Describe any efforts to address potential sources of bias                                                                                                                                                    | 17           |
| Study size                | 10      | Explain how the study size was arrived at                                                                                                                                                                    | 4            |
| Quantitative variables    | 11      | Explain how quantitative variables were handled in the analyses. If applicable, describe which groupings were chosen and why                                                                                 | 3–4          |
|                           |         | (a) Describe all statistical methods, including those used to control for confounding                                                                                                                        | 3–4          |
| Statistical methods       | 12      | (b) Describe any methods used to examine subgroups and interactions                                                                                                                                          | 4            |
|                           |         | (c) Explain how missing data were addressed                                                                                                                                                                  | 4            |
|                           |         | (d) If applicable, explain how loss to follow-up was addressed                                                                                                                                               | 4            |
|                           |         | (e) Describe any sensitivity analyses                                                                                                                                                                        | 3–4          |
| Results                   |         |                                                                                                                                                                                                              |              |
| Participants              | 13      | (a) Report numbers of individuals at each stage of study—eg numbers potentially eligible, examined for eligibility, confirmed eligible, included in the study, completing follow-up, and analysed            | 4            |
|                           |         | (b) Give reasons for non-participation at each stage                                                                                                                                                         | 21           |
|                           |         | (c) Consider use of a flow diagram                                                                                                                                                                           | Figure S1    |
| Descriptive data          | 14      | (a) Give characteristics of study participants (eg demographic, clinical, social) and information on exposures and potential confounders                                                                     | 5–6, Table 1 |
|                           |         | (b) Indicate number of participants with missing data for each variable of interest                                                                                                                          | Table S2     |
| Outcome data              | 15      | (c) Summarise follow-up time (eg, average and total amount)                                                                                                                                                  | 6–8          |
|                           |         | Report numbers of outcome events or summary measures over time                                                                                                                                               | 7            |
| Main results              | 16      | (a) Give unadjusted estimates and, if applicable, confounder-adjusted estimates and their precision (eg, 95% confidence interval). Make clear which confounders were adjusted for and why they were included | 3, 6–8       |
|                           |         | (b) Report category boundaries when continuous variables were categorized                                                                                                                                    | 7            |
|                           |         | (c) If relevant, consider translating estimates of relative risk into absolute risk for a meaningful time period                                                                                             | -            |
| Other analyses            | 17      | Report other analyses done—eg analyses of subgroups and interactions, and sensitivity analyses                                                                                                               | 8–17         |
| Discussion                |         |                                                                                                                                                                                                              |              |
| Key results               | 18      | Summarise key results with reference to study objectives                                                                                                                                                     | 17–19        |
| Limitations               | 19      | Discuss limitations of the study, taking into account sources of potential bias or imprecision.                                                                                                              | 19           |
|                           |         | Discuss both direction and magnitude of any potential bias                                                                                                                                                   |              |
| Interpretation            | 20      | Give a cautious overall interpretation of results considering objectives, limitations, multiplicity of analyses, results from similar studies, and other relevant evidence                                   | 17–19        |
| Generalisability          | 21      | Discuss the generalisability (external validity) of the study results                                                                                                                                        | 17–19        |
| Other information         |         |                                                                                                                                                                                                              |              |
| Funding                   | 22      | Give the source of funding and the role of the funders for the present study and, if applicable, for the original study on which the present article is based                                                | 20           |

Table S2. Missing values.

| Measures                | Missing Values   |      |          |       |                  |      |                      |      |
|-------------------------|------------------|------|----------|-------|------------------|------|----------------------|------|
|                         | Study Population |      | COVID-19 |       | Overall Controls |      | Respiratory Controls |      |
|                         | n = 1081         |      | n = 191  |       | n = 890          |      | n = 323              |      |
|                         | N                | %    | N        | %     | N                | %    | N                    | %    |
| Age                     | 0                | 0.0% | 0        | 0.0%  | 0                | 0.0% | 0                    | 0.0% |
| Systolic BP             | 79               | 7.3% | 19       | 9.9%  | 60               | 6.7% | 25                   | 2.3% |
| Diastolic BP            | 96               | 8.9% | 23       | 12.0% | 73               | 8.2% | 29                   | 2.7% |
| Heart rate              | 59               | 5.5% | 16       | 8.4%  | 43               | 4.8% | 15                   | 1.4% |
| Blood oxygen saturation | 7                | 0.6% | 2        | 1.0%  | 5                | 0.6% | 2                    | 0.2% |
| Respiratory rate        | 74               | 6.8% | 18       | 9.4%  | 56               | 6.3% | 16                   | 1.5% |
| Temperature             | 72               | 6.7% | 22       | 11.5% | 50               | 5.6% | 18                   | 1.7% |
| Leukocytes              | 13               | 1.2% | 0        | 0.0%  | 13               | 1.5% | 6                    | 0.6% |
| Lymphocytes             | 31               | 2.9% | 7        | 3.7%  | 24               | 2.7% | 11                   | 1.0% |
| Lymphocytes absolute    | 31               | 2.9% | 7        | 3.7%  | 24               | 2.7% | 11                   | 1.0% |
| Thrombocytes            | 24               | 2.2% | 5        | 2.6%  | 19               | 2.1% | 9                    | 0.8% |
| CRP                     | 10               | 0.9% | 1        | 0.5%  | 9                | 1.0% | 5                    | 0.5% |
| Ferritin                | 55               | 5.1% | 7        | 3.7%  | 48               | 5.4% | 16                   | 1.5% |
| eGFR                    | 10               | 0.9% | 7        | 3.7%  | 15               | 1.7% | 7                    | 0.6% |
| Sodium                  | 22               | 2.0% | 7        | 3.7%  | 15               | 1.7% | 7                    | 0.6% |
| Potassium               | 22               | 2.0% | 7        | 3.7%  | 15               | 1.7% | 7                    | 0.6% |
| LDH                     | 58               | 5.4% | 7        | 3.7%  | 51               | 5.7% | 26                   | 2.4% |
| ASAT                    | 57               | 5.3% | 8        | 4.2%  | 49               | 5.5% | 25                   | 2.3% |
| Albumin                 | 24               | 2.2% | 8        | 4.2%  | 16               | 1.8% | 8                    | 0.7% |
| Hs-cTnT                 | 56               | 5.2% | 13       | 6.8%  | 43               | 4.8% | 15                   | 1.4% |
| NT-pro-BNP              | 105              | 9.7% | 27       | 14.1% | 78               | 8.8% | 26                   | 2.4% |

BP = blood pressure, CRP = c-reactive protein, eGFR = estimated glomerular filtration rate, LDH = lactate dehydrogenase, ASAT = aspartate aminotransferase, hs-cTnT = high-sensitivity troponin T, NT-proBNP = N-terminal prohormone B-type natriuretic peptide.

Table S3. Baseline characteristics for inpatients in COVID-19 and controls.

| Measures                        | COVID-19<br>n = 114 | Overall Controls<br>n = 444 | p-Value <sup>1</sup> | Respiratory Controls<br>n = 138 | p-Value <sup>2</sup> |
|---------------------------------|---------------------|-----------------------------|----------------------|---------------------------------|----------------------|
| Demographics                    |                     |                             |                      |                                 |                      |
| Age—years                       | 62 (52, 73)         | 71 (56, 81)                 | 0.002                | 71 (56, 79)                     | 0.01                 |
| Female                          | 43 (38)             | 179 (40)                    | 0.613                | 55 (40)                         | 0.729                |
| Comorbidities—no (%)            |                     |                             |                      |                                 |                      |
| Cardiac disease                 | 31 (27)             | 209 (47)                    | <0.001               | 66 (48)                         | 0.001                |
| Valvular cardiopathy            | 8 (7)               | 46 (10)                     | 0.282                | 13 (9)                          | 0.492                |
| Coronary artery disease         | 18 (16)             | 110 (25)                    | 0.042                | 33 (24)                         | 0.11                 |
| Prior myocardial infarction     | 7 (6)               | 61 (14)                     | 0.027                | 17 (12)                         | 0.096                |
| Atrial fibrillation             | 8 (7)               | 78 (18)                     | 0.005                | 28 (20)                         | 0.003                |
| Hypertension                    | 65 (57)             | 240 (54)                    | 0.571                | 80 (58)                         | 0.879                |
| Overweight                      | 62 (54)             | 160 (36)                    | <0.001               | 44 (32)                         | <0.001               |
| Diabetes                        | 33 (29)             | 116 (26)                    | 0.544                | 37 (27)                         | 0.706                |
| Ever smoker                     | 38 (33)             | 194 (44)                    | 0.045                | 85 (62)                         | <0.001               |
| -Active smoker                  | 7 (6)               | 104 (23)                    | <0.001               | 49 (36)                         | <0.001               |
| -Packyears >20                  | 16 (14)             | 110 (25)                    | 0.014                | 53 (38)                         | <0.001               |
| Pneumopathy                     | 22 (19)             | 139 (31)                    | 0.012                | 64 (46)                         | <0.001               |
| -Asthma                         | 12 (11)             | 28 (6)                      | 0.119                | 14 (10)                         | 0.921                |
| -COPD                           | 8 (7)               | 76 (17)                     | 0.007                | 42 (30)                         | <0.001               |
| Hepatopathy                     | 9 (8)               | 69 (16)                     | 0.036                | 24 (17)                         | 0.026                |
| CKD                             | 25 (22)             | 129 (29)                    | 0.129                | 32 (23)                         | 0.812                |
| Stroke                          | 8 (7)               | 58 (13)                     | 0.075                | 17 (12)                         | 0.161                |
| Cancer                          | 13 (11)             | 70 (16)                     | 0.243                | 23 (17)                         | 0.235                |
| Immunodeficiency                | 8 (7)               | 42 (9)                      | 0.415                | 15 (11)                         | 0.291                |
| Symptoms at ED(%)               |                     |                             |                      |                                 |                      |
| Symptom duration before ED—days | 7 (3, 10)           | 3 (1, 7)                    | <0.001               | 3 (2, 7)                        | <0.001               |
| Cough                           | 76 (67)             | 196 (44)                    | <0.001               | 91 (66)                         | 0.904                |
| Dyspnea                         | 50 (44)             | 197 (44)                    | 0.922                | 84 (61)                         | 0.007                |
| Vital signs at ED               |                     |                             |                      |                                 |                      |
| Systolic BP—mmHg                | 134 (120, 147)      | 135 (117, 157)              | 0.507                | 137 (120, 159)                  | 0.328                |
| Diastolic BP—mmHg               | 80 (70, 90)         | 80 (69, 87)                 | 0.319                | 80 (70, 87)                     | 0.774                |
| Heart rate—/min                 | 90 (80, 105)        | 91.5 (78, 108)              | 0.883                | 94.5 (78, 109)                  | 0.386                |
| Blood oxygen saturation—%       | 95 (93, 97)         | 96 (94, 98)                 | 0.005                | 95 (92, 97)                     | 0.986                |
| Respiratory rate—/min           | 23 (16, 25)         | 21 (16, 25)                 | 0.209                | 22.5 (19, 27)                   | 0.299                |
| Temperature—°C                  | 37.35 (36.8, 38.2)  | 37.2 (36.8, 38.2)           | 0.425                | 37.2 (36.9, 38.2)               | 0.78                 |
| Laboratory parameters at ED     |                     |                             |                      |                                 |                      |
| Leukocytes—G/L                  | 6.67 (5.13, 8.89)   | 10.23 (7.46, 14.07)         | <0.001               | 10.50 (8.29, 14.09)             | <0.001               |
| Lymphocytes—%                   | 15.3 (8.3, 21.3)    | 11.1 (6, 16.7)              | <0.001               | 9.9 (5.6, 16.3)                 | <0.001               |
| Lymphocytes absolute—G/L        | 0.96 (0.60, 1.33)   | 1.035 (0.70, 1.60)          | 0.069                | 1.04 (0.70, 1.60)               | 0.106                |
| Thrombocytes—G/L                | 219 (171, 282)      | 234 (186, 303)              | 0.115                | 251.5 (202, 298)                | 0.023                |

|                                 |                    |                  |        |                    |        |
|---------------------------------|--------------------|------------------|--------|--------------------|--------|
| CRP—mg/dL                       | 58.6 (31.5, 126.9) | 35.6 (6.9, 94.9) | <0.001 | 46.0 (10.2, 117.3) | 0.044  |
| Ferritin—μg/L                   | 705 (330, 1263)    | 228 (114, 477)   | <0.001 | 220 (109, 384)     | <0.001 |
| eGFR—mL/min/1.73 m <sup>2</sup> | 81 (54, 96)        | 76 (51, 95)      | 0.513  | 77 (56, 97)        | 0.755  |
| Sodium—mmol/L                   | 135 (133, 139)     | 138 (134, 141)   | 0.001  | 138 (134, 141)     | 0.013  |
| Potassium—mmol/L                | 3.9 (3.7, 4.4)     | 4.1 (3.8, 4.4)   | 0.074  | 4.1 (3.8, 4.4)     | 0.033  |
| LDH—U/L                         | 333 (254, 444)     | 233 (196, 296)   | <0.001 | 232 (195, 315)     | <0.001 |
| ASAT—U/L                        | 39 (27, 53)        | 27 (21, 39)      | <0.001 | 28 (22, 40)        | <0.001 |
| Albumin—g/L                     | 31 (28, 35)        | 33 (29, 37)      | 0.003  | 32 (29, 36)        | 0.252  |
| Hs-cTnT                         | 13 (6, 22)         | 21 (9, 38)       | <0.001 | 19 (9, 36)         | 0.003  |
| NT-pro-BNP—pg/mL                | 114 (49, 552)      | 420 (129, 1624)  | <0.001 | 323 (147, 1478)    | <0.001 |

<sup>1</sup> *p*-value for comparison of COVID-19 with overall controls; <sup>2</sup> *p*-value for comparison of COVID-19 with respiratory controls. Continuous variables were compared using the Mann-Whitney-U test, and categorical variables using the Pearson  $\chi^2$  test or Fisher's exact test, as appropriate; missing variables are listed in supplemental Table S2 Values are numbers (percentages) or median (interquartile range); COVID-19 = coronavirus disease 2019, COPD = chronic obstructive pulmonary disease, CKD = chronic kidney disease, ED = emergency department, BP = blood pressure, CRP = c-reactive protein, eGFR = estimated glomerular filtration rate, LDH = lactate dehydrogenase, ASAT = aspartate aminotransferase, hs-cTnT = high-sensitivity troponin T, NT-proBNP = N-terminal prohormone B-type natriuretic peptide.

**Table S4.** Comparison of the COLT-58-Score and the CURB-65-Score.

| Measures                                    | AUROC            |                  | <i>p</i> -Value | NRI (%) | <i>p</i> -Value |
|---------------------------------------------|------------------|------------------|-----------------|---------|-----------------|
|                                             | COLT-58-Score    | CURB-65-Score    |                 |         |                 |
| COVID-19 ( <i>n</i> = 191)                  |                  |                  |                 |         |                 |
| ICU admission or death at 30 days           | 0.88 (0.83–0.94) | 0.77 (0.69–0.86) | <0.001          | 30.04   | 0.013           |
| Death at 30 days                            | 0.94 (0.90–0.98) | 0.91 (0.85–0.97) | 0.305           | 14.87   | 0.474           |
| Respiratory controls ( <i>n</i> = 323)      |                  |                  |                 |         |                 |
| ICU admission or death at 30 days           | 0.85 (0.79–0.91) | 0.81 (0.73–0.89) | 0.288           | 15.87   | 0.255           |
| Death at 30 days                            | 0.88 (0.80–0.96) | 0.86 (0.76–0.97) | 0.832           | -3.6    | 0.877           |
| Any respiratory infection ( <i>n</i> = 514) |                  |                  |                 |         |                 |
| ICU admission or death at 30 days           | 0.87 (0.83–0.91) | 0.77 (0.71–0.83) | <0.001          | 26.92   | 0.003           |
| Death at 30 days                            | 0.91 (0.86–0.96) | 0.88 (0.82–0.94) | 0.500           | 7.3     | 0.639           |

AUROC = area under the receiver operating characteristic curve, NRI = net reclassification improvement, COVID-19 = coronavirus disease 2019.
